# Supplementary material for: Marine Migrastatics: A Comprehensive 2022 Update
Source: MDPI journal article supplement (doi:10.3390/md20050273), 2022-04-19
Supplement: s1 [file s1]

Click over pictures

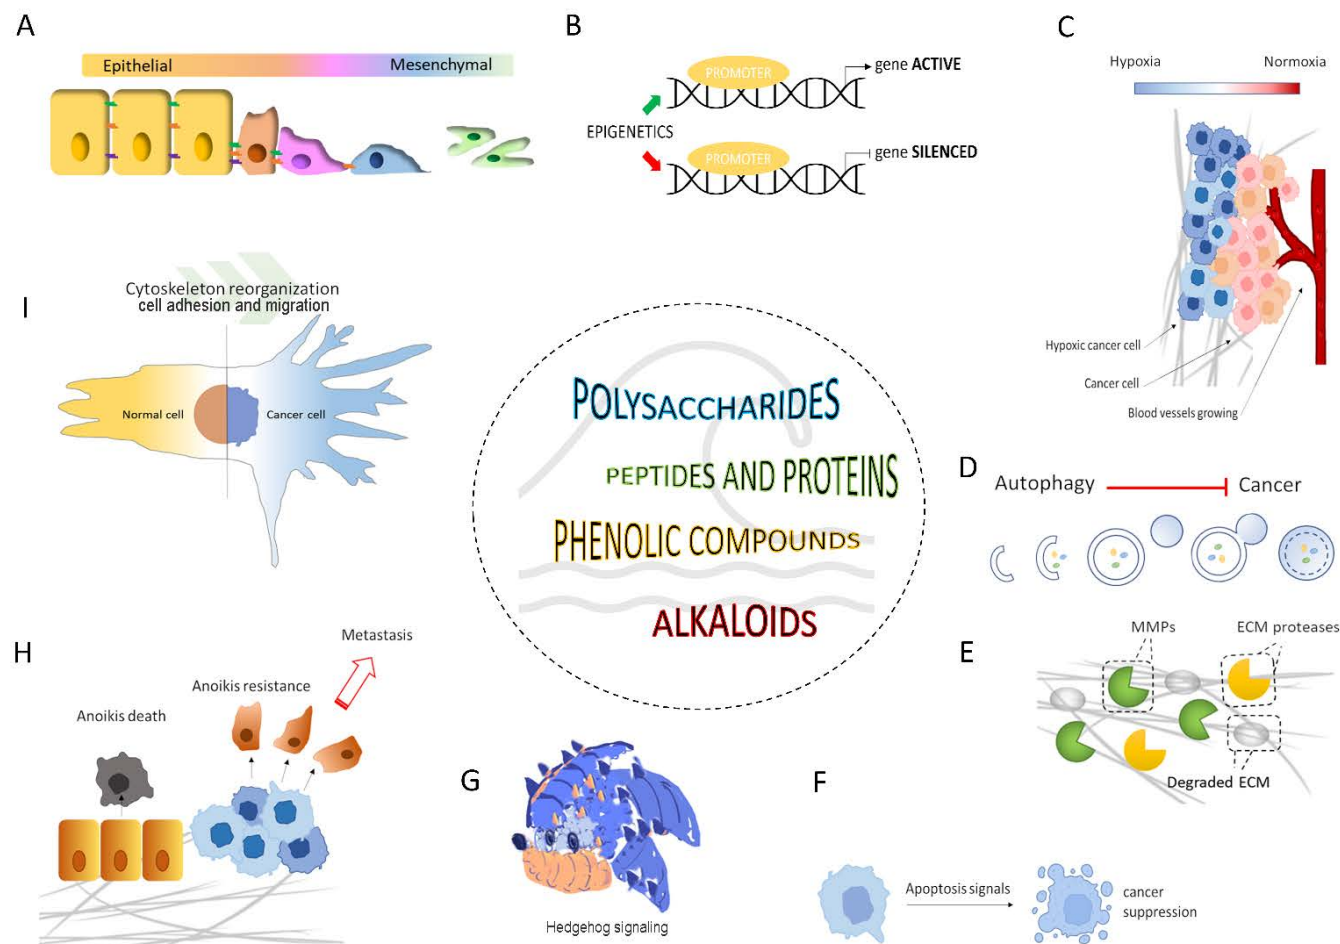

Figure S1. Schematic representation of potential molecular targets of marine migrastatics (2017-2022): (A) epithelial-mesenchymal transition; (B) epigenetic control; (C) neo-angiogenesis and hypoxia; (D) autophagy; (E) ECM degradation by MMPs and other proteases; (F) apoptosis; (G) Hedgehog signalling pathway; (H) resistance to anoikis; (I) cytoskeletal reorganization, cell adhesion and migration. Click on each picture to view the involved migrastatic marine compound.

To go back to the pictures click on the table

### Epithelial-to-Mesenchymal Transition

| Compound                    | Marine source                                                     |
|-----------------------------|-------------------------------------------------------------------|
| Actinomycin V               | <i>Streptomyces sp.</i>                                           |
| Jorunnamycin A              | <i>Xestospongia sp.</i>                                           |
| Manzamine A                 | <i>Haliclona sp.</i> , <i>Xestospongia sp.</i> <i>Pellina sp.</i> |
| $\alpha$ O-conotoxin GeXIVA | <i>C. generalis</i>                                               |

To go back to the pictures click on the table

### Epigenetic control

| Compound        | Marine source                         |
|-----------------|---------------------------------------|
| Chromopeptide A | <i>Chromobacterium sp.</i> , HS-13-94 |

To go back to the pictures click on the table

### Neo-angiogenesis and hypoxia

| Compound                              | Marine source             |
|---------------------------------------|---------------------------|
| AATP                                  | <i>H. discus hannai</i>   |
| BABP                                  | <i>H. discus hannai</i>   |
| Crude sulfate polysaccharides extract | <i>P. tetrastromatica</i> |
| 7-Phloroeckol                         | <i>E. Cava</i>            |

To go back to the pictures click on the table

### Autophagy

| Compound           | Marine source                              |
|--------------------|--------------------------------------------|
| BFP-3              | <i>B. fuscopurpurea</i>                    |
| Catechin           | <i>P. Oceanica</i>                         |
| Chlorogenic acid   | <i>P. Oceanica</i>                         |
| Dihydroauroglaucin | <i>E. chevalieri</i>                       |
| Epicatechin        | <i>P. Oceanica</i>                         |
| Ferulic acid       | <i>P. boergesenii</i> , <i>P. oceanica</i> |
| Gallic acid        | <i>P. boergesenii</i> , <i>P. oceanica</i> |

To go back to the pictures click on the table

### ECM degradation by MMPs and other proteases

| Compound                              | Marine source                                           |
|---------------------------------------|---------------------------------------------------------|
| AATP                                  | <i>H. discus hannai</i>                                 |
| BABP                                  | <i>H. discus hannai</i>                                 |
| Catechin                              | <i>P. oceanica</i>                                      |
| Chlorogenic acid                      | <i>P. Oceanica</i>                                      |
| Crude sulfate polysaccharides extract | <i>P. tetrastromatica</i>                               |
| Dieckol                               | <i>E. Cava</i>                                          |
| Epicatechin                           | <i>P. Oceanica</i>                                      |
| Ferulic acid                          | <i>P. boergesenii</i> , <i>P. oceanica</i> ,            |
| Fucoidan-like STPC2                   | <i>S. thunbergii</i>                                    |
| Gallic acid                           | <i>P. boergesenii</i> , <i>P. oceanica</i>              |
| Grassystatin F                        | <i>Cyanobacterium VPG 14-61</i>                         |
| Laminaran sulfate                     | <i>F. evanescens</i>                                    |
| Nobilamide I                          | <i>Saccharomonospora sp.</i> ,<br><i>strain CNQ-490</i> |
| PBN11-8                               | <i>B. pumilus</i>                                       |
| Phlorofucofuroeckol                   | <i>E. cava</i>                                          |
| SIP-SII                               | <i>S. maindroni</i>                                     |

To go back to the pictures click on the table

### Apoptosis

| Compound              | Marine source                             |
|-----------------------|-------------------------------------------|
| BFP-3                 | <i>B. fuscopurpurea</i>                   |
| Caffeic acid          | <i>P. boergeseni</i>                      |
| Ferulic acid          | <i>P. boergeseni</i> , <i>P. oceanica</i> |
| Gallic acid           | <i>P. boergeseni</i> , <i>P. oceanica</i> |
| N-V protease (or NAP) | <i>N. virens</i>                          |
| Quercetin             | <i>P. boergeseni</i>                      |
| Rutin                 | <i>P. boergeseni</i>                      |

To go back to the pictures click on the table

### Hedgehog signaling

| Compound | Marine source         |
|----------|-----------------------|
| SPUP     | <i>U. Pinnatifida</i> |



To go back to the pictures click on the table

**Resistance to anoikis**

| <b>Compound</b>       | <b>Marine source</b>    |
|-----------------------|-------------------------|
| <b>Jorunnamycin A</b> | <i>Xestospongia sp.</i> |

To go back to the pictures click on the table

### Cytoskeletal reorganization, cell adhesion and migration

| Compound             | Marine source                        |
|----------------------|--------------------------------------|
| Aeroplysinin-1       | <i>A. aerophoba</i>                  |
| Chromopeptide A      | <i>Chromobacterium</i> sp., HS-13-94 |
| CLP                  | <i>Marine microorganisms</i>         |
| Dieckol              | <i>E. Cava</i>                       |
| Exopolysaccharide 11 | <i>Bacillus</i> sp. 11               |
| Fucoidan             | <i>C. frondosa</i>                   |
| Molassamide          | <i>Cyanobacterium</i> DRTO-73        |
| PBN11-8              | <i>B. pumilus</i>                    |
| Phlorofucofuroeckol  | <i>E. Cava</i>                       |
| SIP-SII              | <i>S. maindroni</i>                  |
| Sulfated galactans   | <i>G. fisheri</i>                    |
| Viriditoxin          | <i>P. variotii</i>                   |
